# Supplementary material for: Synthesis and Phase Transition of Poly(N-isopropylacrylamide)-Based Thermo-Sensitive Cyclic Brush Polymer
Source: MDPI journal article supplement (doi:10.3390/polym9070301), 2017-07-23
Supplement: s1 [file s1]

*Supporting Information*  
*of*  
**Synthesis and Phase Transition of Poly(N-  
isopropylacrylamide)-based Thermo-sensitive Cyclic  
brush Polymer**

1. Figure S1
2. Figure S2

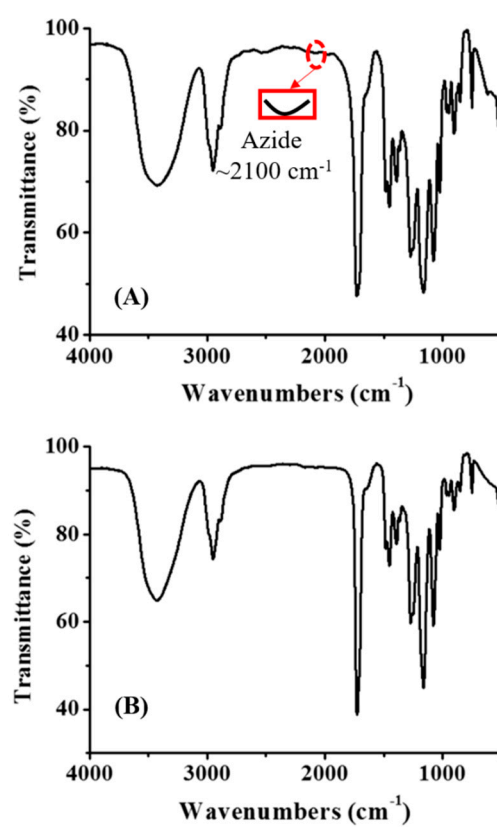

Figure S1. FT-IR spectra of *l*-alkyne-PHEMA- $\text{N}_3$  (A) and *c*-PHEMA(B).

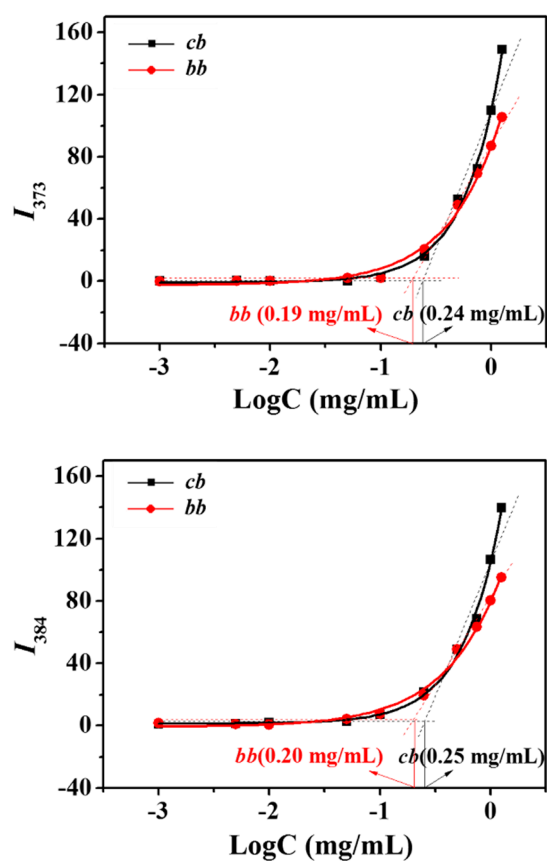

**Figure S2.**  $I_{373}$  and  $I_{384}$  in the emission spectra as a function of logarithm of *cb*-P(HEMA-g-PNIPAAm<sub>182</sub>)<sub>50</sub> and *bb*-P(HEMA-g-PNIPAAm<sub>182</sub>)<sub>50</sub> concentration,  $\lambda_{\text{ex}} = 339$  nm, [Pyrene] =  $2 \times 10^{-6}$  M.
